# Supplementary material for: Simultaneous Expression of Long Non-Coding RNA FAL1 and Extracellular Matrix Protein 1 Defines Tumour Behaviour in Young Patients with Papillary Thyroid Cancer
Source: MDPI journal article supplement (doi:10.3390/cancers13133223), 2021-06-28
Supplement: s1 [file s1]

# Simultaneous Expression of Long Non-coding RNA *FAL1* and Extracellular Matrix Protein 1 Defines Tumour Behaviour in Young Patients with Papillary Thyroid Cancer

Seonhyang Jeong, Seul-Gi Lee, Hyunji Kim, Gibbeum Lee, Sunmi Park, In-Kyu Kim, Jandee Lee \* and Young-Suk Jo \*

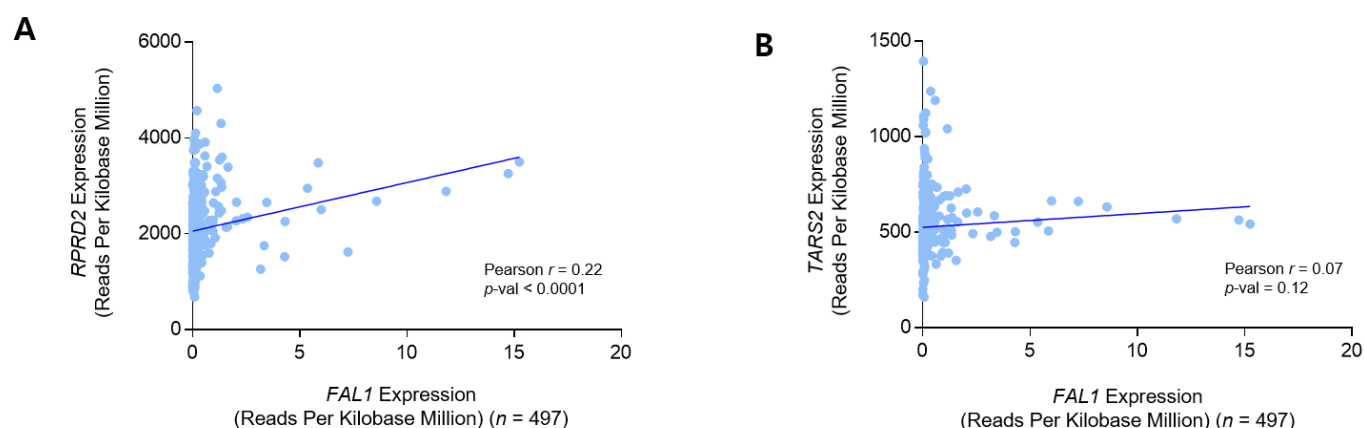

**Figure S1.** Correlation analysis of *FAL1* expression with *RPRD2* and *TARS2* expression in THCA. **(A)** Correlation of *FAL1* expression with *RPRD2* expression ( $n = 497$ ). **(B)** Correlation of *FAL1* expression with *TARS2* expression ( $n = 497$ ). Correlation analysis was performed using Pearson's correlation coefficient.

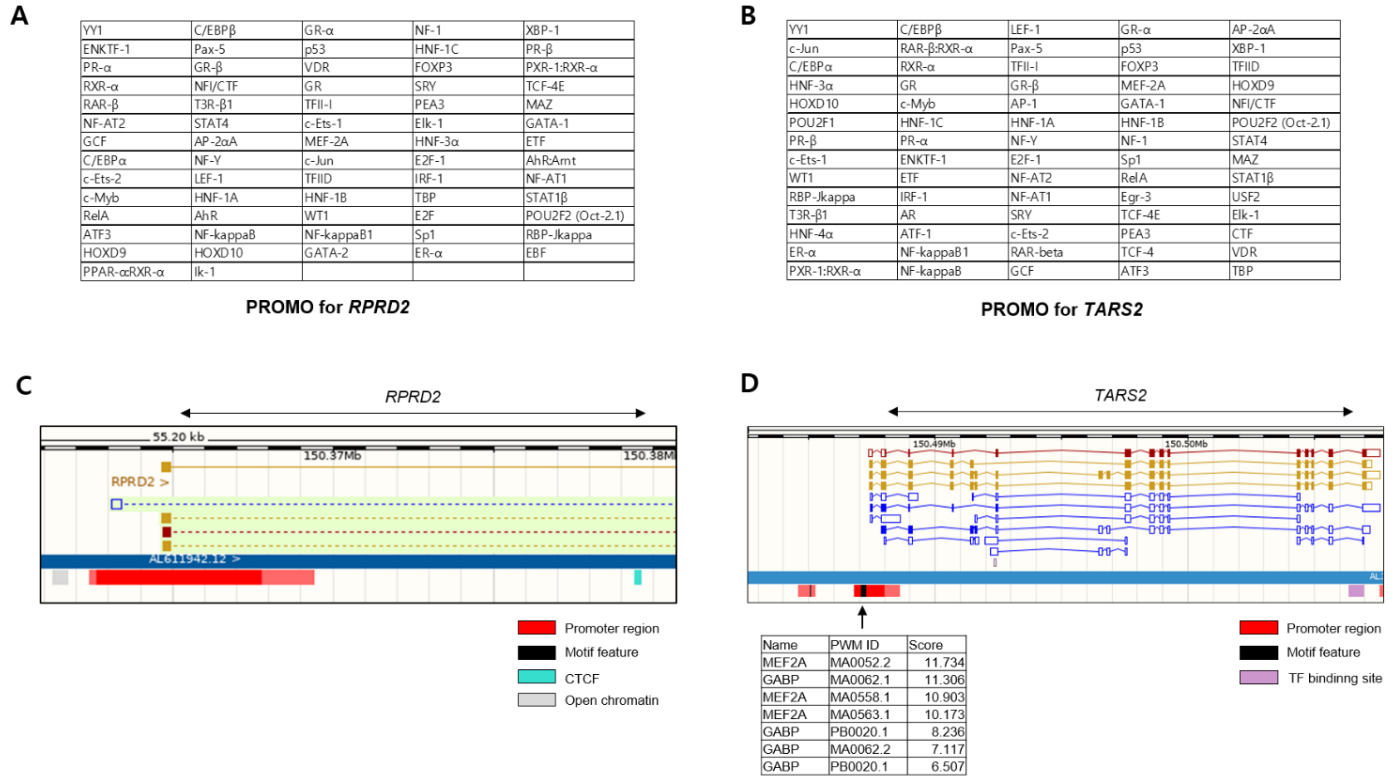

**Figure S2.** Confirmation of transcription factor binding site of *RPRD2* and *TARS2* promoters. (A) Results of PROMO analysis that predicted TFBS from the DNA sequence of *RPRD2* gene. (B) Results of PROMO analysis that predicted TFBS from the DNA sequence of *TARS2* gene. (C) Results of analysis of the TFBS of *RPRD2* gene using ENCODE. (D) Results of analysis of the TFBS of *TARS2* gene using ENCODE.

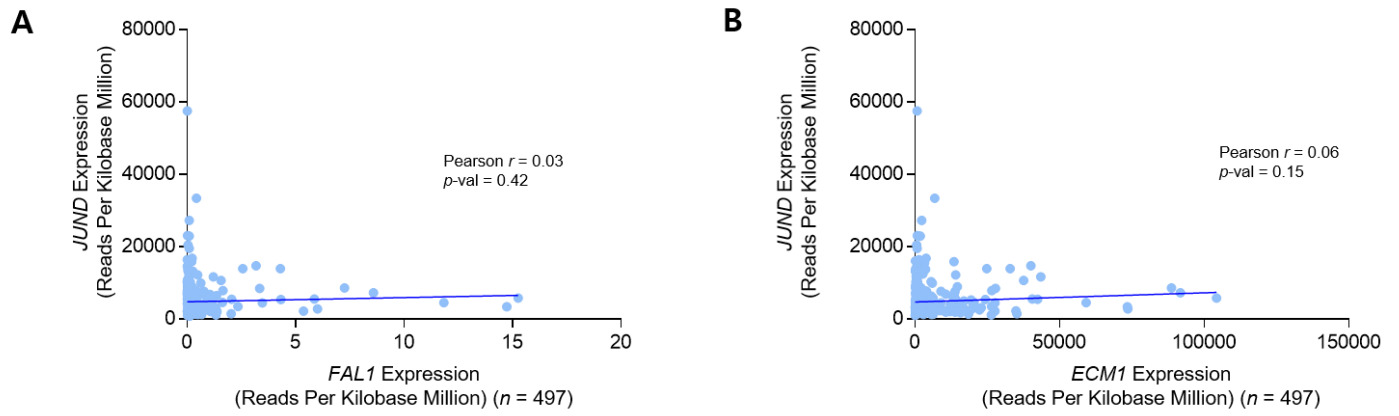

**Figure S3.** Correlation analysis of *JUND* expression with *FAL1*, *ECM1* expression in THCA. (A) Correlation of *JUND* expression with *FAL1* expression ( $n = 497$ ). (B) Correlation of *JUND* expression with *ECM1* expression ( $n = 497$ ). Correlation analysis was performed using Pearson's correlation coefficient.

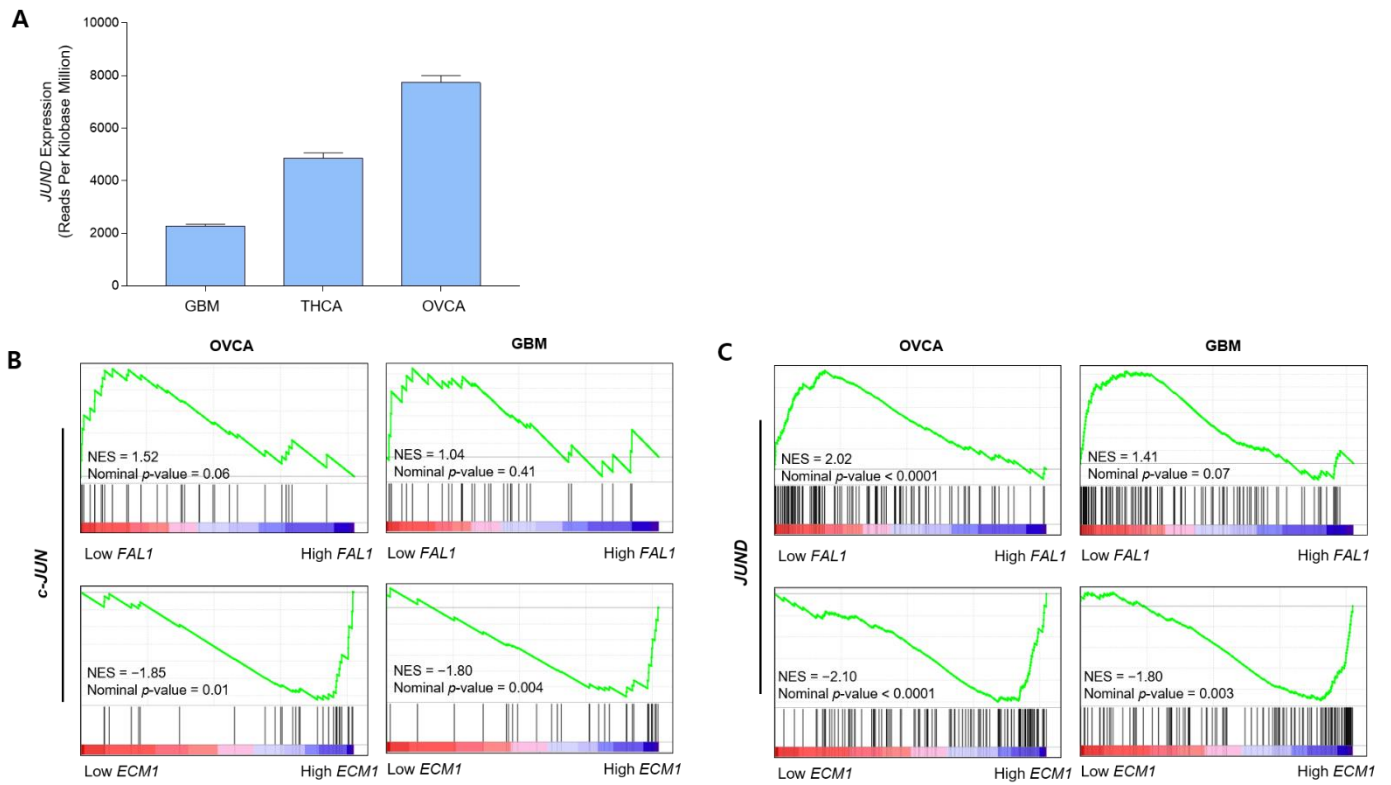

**Figure S4.** *JUND* expression and transcriptional target gene expression in GBM and OVCA. **A.** *JUND* expression status in GBM, THCA, and OVCA. **B.** Transcriptional target gene expression of *c-JUN* according to *ECM1* and *FAL1* expression patterns in GBM and OVCA. **C.** Transcriptional target gene expression of *JUND* according to *ECM1* and *FAL1* expression patterns in GBM and OVCA. Data are presented as mean  $\pm$  S.D. Abbreviations: GBM Glioblastoma, OVCA ovarian cancer.

**Table S1.** Comparison of 1q arm-level amplification in TCGA THCA according to *FAL1* expression status.

| 1q arm-level amplification | <i>FAL1</i> Expression   |                           | <i>p</i> value |
|----------------------------|--------------------------|---------------------------|----------------|
|                            | Low ( <i>n</i> = 124, %) | High ( <i>n</i> = 122, %) |                |
| Absent                     | 109 (87.9)               | 96 (78.7)                 | 0.053          |
| Present                    | 15 (12.1)                | 26 (21.3)                 |                |
